# Supplementary material for: RCPred: RNA complex prediction as a constrained maximum weight clique problem
Source: PubMed Central journal article supplement (PMC6439972; doi:10.1186/s12859-019-2648-1), 2019-03-29
Supplement: 12859_2019_2648_MOESM1_ESM.pdf [file 12859_2019_2648_MOESM1_ESM.pdf]

RESEARCH

# Additional File of “RCPred: RNA Complex Prediction as a constrained maximum weight clique problem”

Audrey Legendre, Eric Angel and Fariza Tahiri\*

\*Correspondence:

[fariza.tahiri@univ-evry.fr](mailto:fariza.tahiri@univ-evry.fr)

IBISC, Univ Evry, Université  
Paris-Saclay, 91025 Evry, France  
Full list of author information is  
available at the end of the article

## Additional results

**Figure 1 Sensitivity results of RCPred, NanoFolder, NUPACK and MultiRNAFold.** For RCPred and NUPACK, the maximum  $F_1$ -scores among the 10 first returned solutions are taken for each complex to compute the mean. The mean sensitivity of these solutions is then computed. For RCPred, the mean is computed over 5 executions. The complex lengths are indicated in nucleotides in the superior axis.

**Figure 2 PPV results of RCPred, NanoFolder, NUPACK and MultiRNAFold.** For RCPred and NUPACK, the maximum  $F_1$ -scores among the 10 first returned solutions are taken for each complex to compute the mean. The mean PPV of these solutions is then computed. For RCPred, the mean is computed over 5 executions. The complex lengths are indicated in nucleotides in the superior axis.

**Figure 3 MCC results of RCPred, NanoFolder, NUPACK and MultiRNAFold.** For RCPred and NUPACK, the maximum  $F_1$ -scores among the 10 first returned solutions are taken for each complex to compute the mean. The mean MCC of these solutions is then computed. For RCPred, the mean is computed over 5 executions. The complex lengths are indicated in nucleotides in the superior axis.
